# Supplementary material
Source: Springer Nature journal article supplement (https://www.springermedizin.de/resource/supplementary/13014_2009_228_MOESM3_ESM.pdf/9633226)

**A**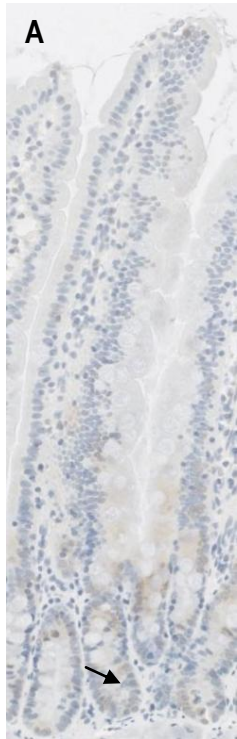**B**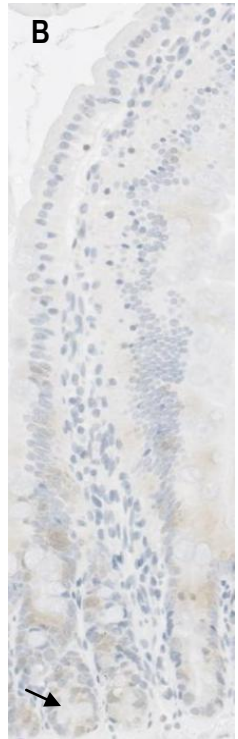**C**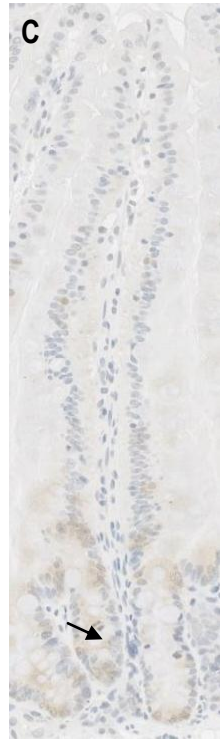**D**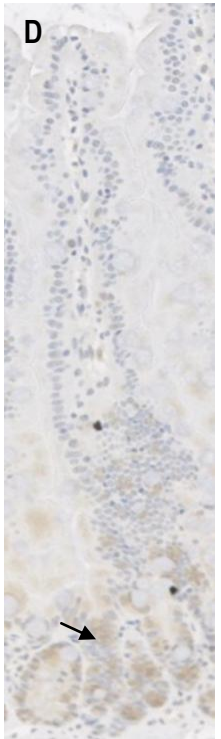**E**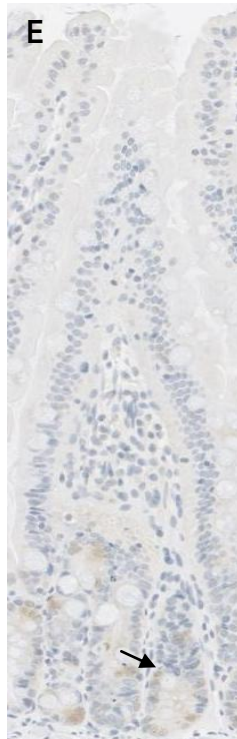**F**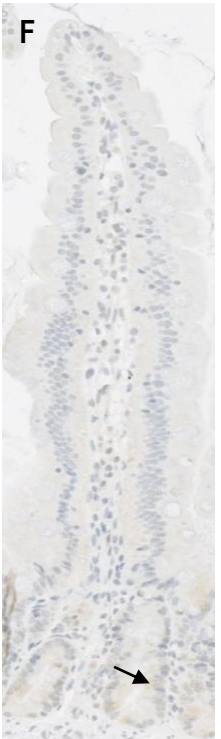**G**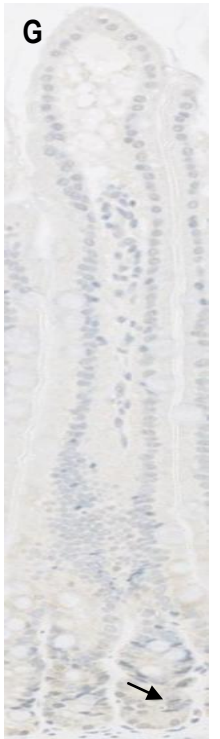

Supplement: MOESM3 [file 9633226]
